# Supplementary material
Source: Springer Nature journal article supplement (https://www.springermedizin.de/resource/supplementary/12885_2011_2914_MOESM11_ESM.pdf/9462328)

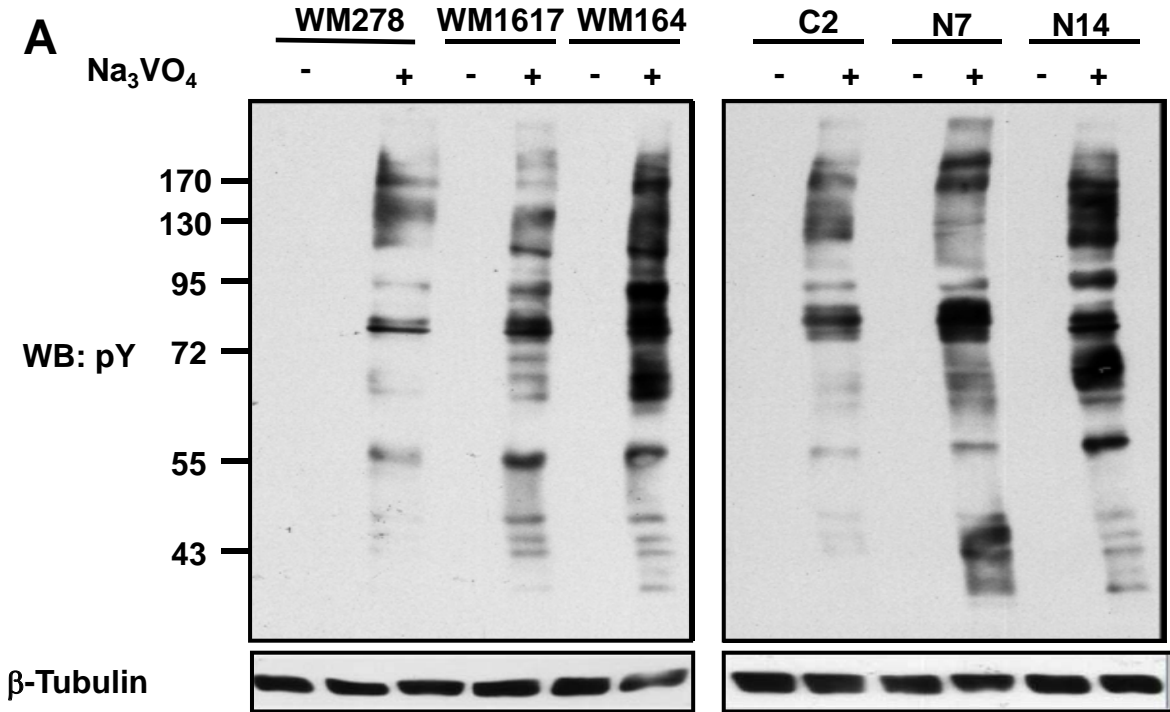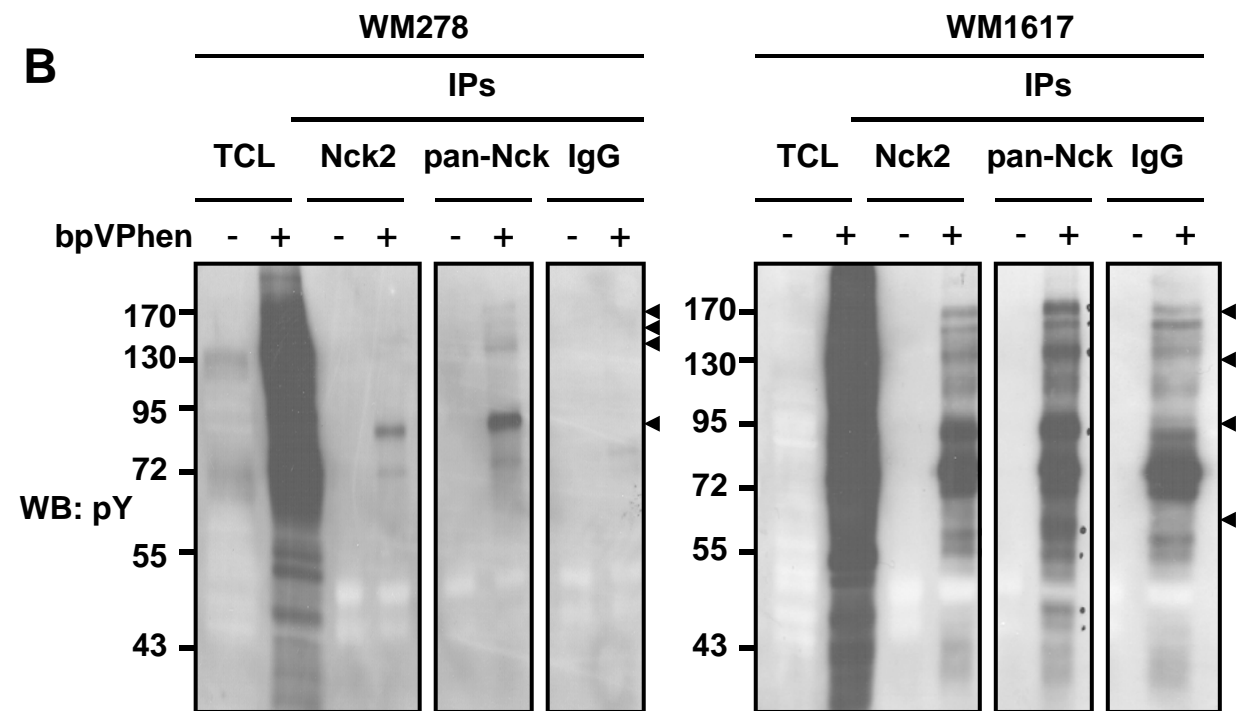

Supplement: MOESM11 [file 9462328]
